# Supplementary material for: Dynamic patterns of DNA methylation in the normal prostate epithelial differentiation program are targets of aberrant methylation in prostate cancer
Source: PubMed Central journal article supplement (PMC8169877; doi:10.1038/s41598-021-91037-1), 2021-06-01

**Supplementary Figure 1: Identifying global transcriptional and DNA methylation patterns in androgen driven differentiation. A)** Proliferation of HPr1-AR cells treated with DHT (10nM) or vehicle control (EtOH) up to 96hr post-treatment. The data represent experiments performed in biological triplicates. **B)** RT-qPCR assessment of known DHT responsive genes in HPr1-AR cells. **C)** Cytokeratin profiling (immunoblot) of two well established markers of basal cell populations (CK5) and luminal cell populations (CK8). **D)** Heatmap and enrichment plots comparing observed expression changes by RNA-seq (24hr) to those previously reported in HPr1-AR cells by microarray profiling (24hr)[6]. **E)** Summary of all HALLMARK pathway enrichments determined by GSEA analysis (24hr and 96hr relative to 0hr). Normalized Enrichments Scores (NES) are shown on the x-axis. Significant enrichments ( $p_{adj} < 0.1$ ) are shown in blue; non-significant enrichments are shown in grey. **F)** Venn diagram depicting number of significantly enriched pathways from complete GSEA analysis between 24hr and 96hr of DHT exposure.

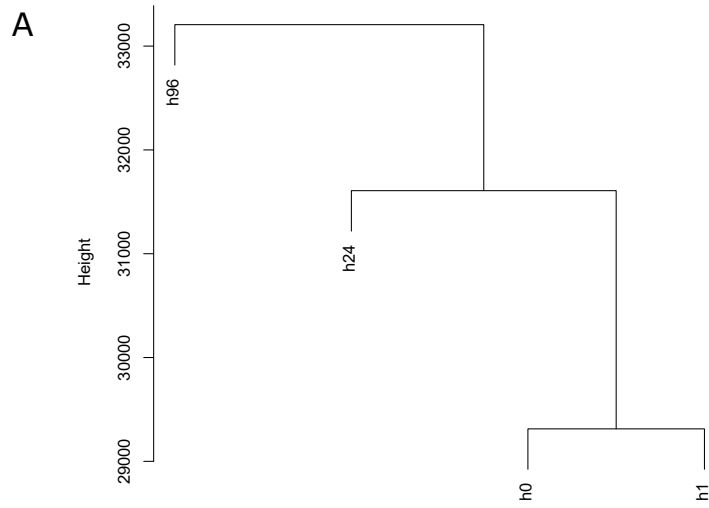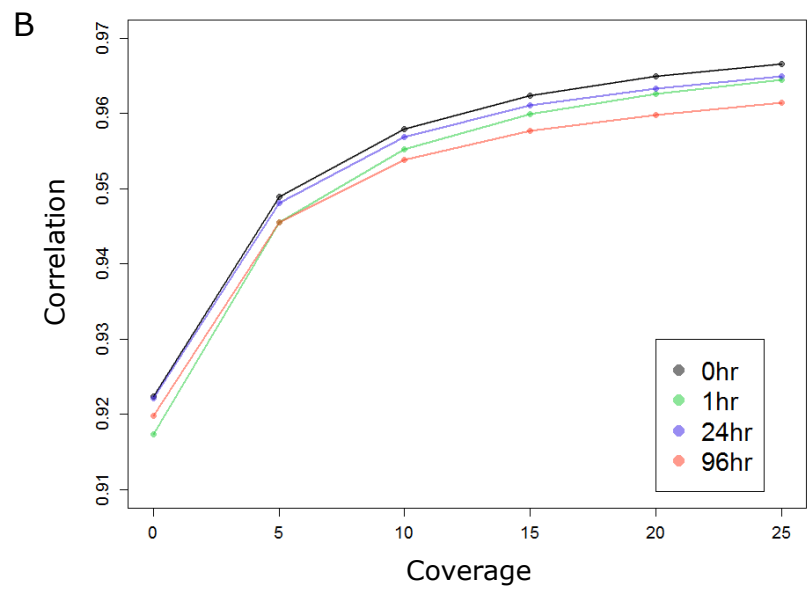

**Supplementary Figure 2: Confirmation of whole-genome bisulfite sequencing approach using TruSeq Methyl Capture sequencing** **A)** Hierarchical clustering of WGBS samples. Euclidean distance was used as a measure of similarity. **B)** Correlation of WGBS methylation calls to those identified in Methyl-Capture seq approach at different levels of sequencing coverage.

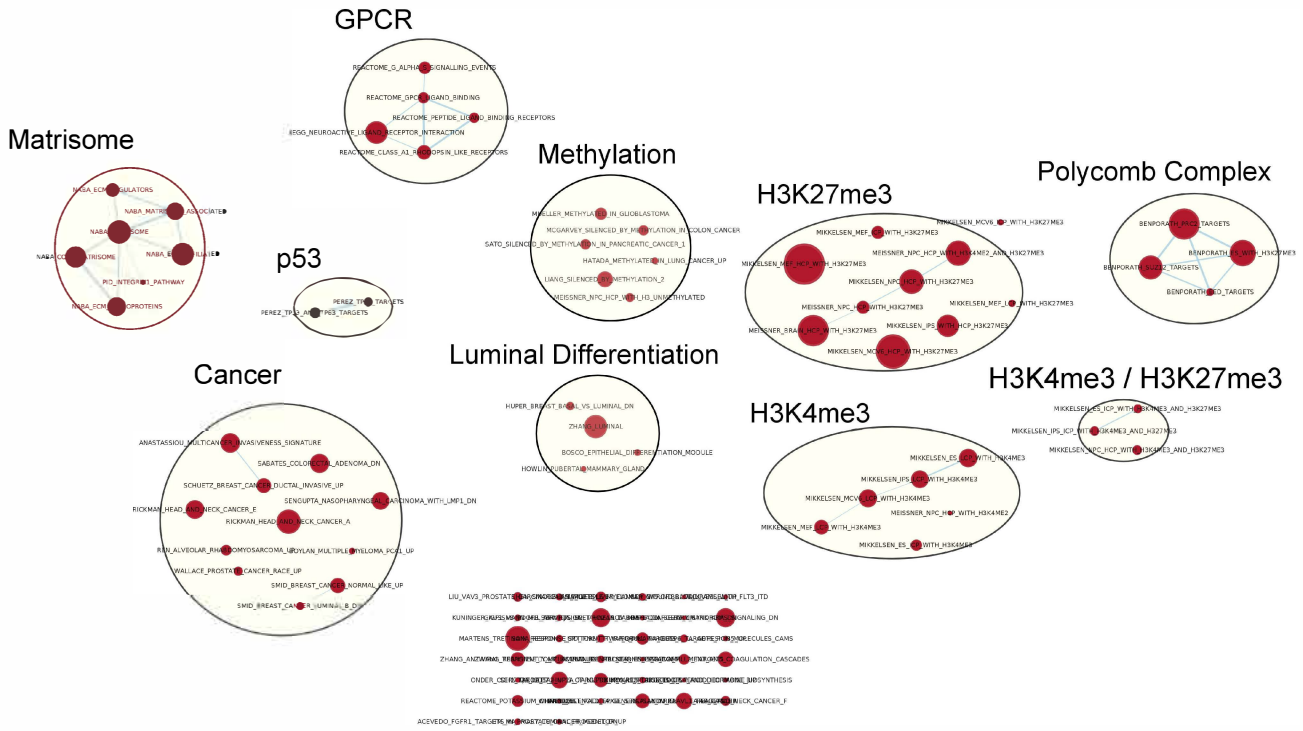

**Supplementary Figure 3: Enrichment map of significantly enriched pathways associated with androgen induced DNA methylation dynamics.** GSEA was performed, using overall variance at TSS loci genome wide, to reveal functional enrichment of genes associated with DNA methylation dynamics. Shown are significantly enriched gene sets (FDR < 0.05). Size of nodes represent normalized enrichment scores, and edges represent an overlap of at least 35% between two gene sets.

**Table S1:** Primers sequences used in study

| <b>Gene</b> | <b>Forward</b>        | <b>Reverse</b>         | <b>Amplicon Length</b> |
|-------------|-----------------------|------------------------|------------------------|
| DPP4        | GAAGAGAGGATTCCAAACAAC | CATTGTTCCAAACATATGCC   | 79                     |
| S100P       | TCTGAATCTAGCACCATGAC  | CATCCTTGTCTTTTCCACTC   | 172                    |
| KRT8        | ACGAATTTGTCCTCATCAAG  | CCGGATCTCCTCTTCATATAG  | 128                    |
| KRT18       | GGAAGTAAAAGGCCTACAAG  | GTACTIONGTCTAGCTCCTCTC | 154                    |
| STEAP4      | TGATTCATATGTGGCTTTGG  | CAGTTTGGACTGGACAAATC   | 124                    |
| TMEM56      | ATGGAACTCAAGGGTAGTATC | TGGACAAATCAGAAATGAGG   | 170                    |
| KRT5        | AGTTTGTGATGCTGAAGAAG  | GTTAATCTCATCCATCAGTGC  | 92                     |
| CPA4        | AGAAATGGAGACGAGATCAG  | GGGAGATTTCCAGAAATTGAG  | 78                     |

**Table S2:** Top 30 significantly enriched upregulated and downregulated pathways in HPr1-AR cells exposed to DHT for 96 hours.

| pathway                                                              | pval     | padj     | NES   |
|----------------------------------------------------------------------|----------|----------|-------|
| BOLTON_ANDROGEN_UP                                                   | 1.40E-04 | 7.67E-03 | 3.02  |
| MENSE_HYPOXIA_UP                                                     | 1.36E-04 | 7.67E-03 | 2.33  |
| ZHANG_LUMINAL                                                        | 1.28E-04 | 7.67E-03 | 2.22  |
| PYEON_CANCER_HEAD_AND_NECK_VS_CERVICAL_UP                            | 1.24E-04 | 7.67E-03 | 2.20  |
| ELVIDGE_HIF1A_TARGETS_DN                                             | 1.37E-04 | 7.67E-03 | 2.15  |
| IIZUKA_LIVER_CANCER_PROGRESSION_G2_G3_UP                             | 1.61E-04 | 8.25E-03 | 2.15  |
| HSIAO_LIVER_SPECIFIC_GENES                                           | 1.29E-04 | 7.67E-03 | 2.13  |
| ELVIDGE_HIF1A_AND_HIF2A_TARGETS_DN                                   | 1.35E-04 | 7.67E-03 | 2.12  |
| DOANE_BREAST_CANCER_CLASSES_UP                                       | 1.44E-04 | 7.67E-03 | 2.11  |
| QI_HYPOXIA                                                           | 1.28E-04 | 7.67E-03 | 2.11  |
| DEMAGALHAES_AGING_UP                                                 | 3.00E-04 | 1.11E-02 | 2.09  |
| SMID_BREAST_CANCER_LUMINAL_B_UP                                      | 1.29E-04 | 7.67E-03 | 2.09  |
| NAKAYAMA_SOFT_TISSUE_TUMORS_PCA2_DN                                  | 1.49E-04 | 7.71E-03 | 2.08  |
| MARTIN_INTERACT_WITH_HDAC                                            | 1.49E-04 | 7.71E-03 | 2.08  |
| FARDIN_HYPOXIA_11                                                    | 3.10E-04 | 1.11E-02 | 2.08  |
| ROSS_AML_OF_FAB_M7_TYPE                                              | 1.42E-04 | 7.67E-03 | 2.06  |
| FARMER_BREAST_CANCER_APOCRINE_VS_LUMINAL                             | 1.16E-04 | 7.67E-03 | 2.06  |
| KEGG_ABC_TRANSPORTERS                                                | 4.58E-04 | 1.28E-02 | 2.04  |
| ONDER_CDH1_TARGETS_2_UP                                              | 1.20E-04 | 7.67E-03 | 2.04  |
| ELVIDGE_HYPOXIA_UP                                                   | 1.25E-04 | 7.67E-03 | 2.03  |
| HOOI_ST7_TARGETS_DN                                                  | 1.35E-04 | 7.67E-03 | 2.02  |
| SEMENZA_HIF1_TARGETS                                                 | 3.08E-04 | 1.11E-02 | 2.02  |
| ELVIDGE_HYPOXIA_BY_DMOG_UP                                           | 1.29E-04 | 7.67E-03 | 2.02  |
| FARMER_BREAST_CANCER_APOCRINE_VS_BASAL                               | 1.15E-04 | 7.67E-03 | 2.02  |
| ZHANG_TLX_TARGETS_DN                                                 | 1.37E-04 | 7.67E-03 | 2.01  |
| REACTOME_COLLAGEN_FORMATION                                          | 2.95E-04 | 1.11E-02 | 2.01  |
| BOQUEST_STEM_CELL_UP                                                 | 1.23E-04 | 7.67E-03 | 2.00  |
| FRASOR_TAMOXIFEN_RESPONSE_UP                                         | 2.95E-04 | 1.11E-02 | 2.00  |
| VALK_AML_CLUSTER_1                                                   | 4.87E-04 | 1.31E-02 | 1.99  |
| BURTON_ADIPOGENESIS_4                                                | 2.95E-04 | 1.11E-02 | 1.98  |
| TIEN_INTESTINE_PROBIOTICS_6HR_UP                                     | 1.31E-03 | 2.37E-02 | -1.98 |
| REACTOME_TRANSLATION                                                 | 4.78E-04 | 1.31E-02 | -1.99 |
| COLLER_MYC_TARGETS_UP                                                | 2.71E-04 | 1.09E-02 | -2.00 |
| REACTOME_SRP_DEPENDENT_COTRANSLATIONAL_PROTEIN_TARGETING_TO_MEMBRANE | 4.31E-04 | 1.23E-02 | -2.01 |
| KEGG_SELENOAMINO_ACID_METABOLISM                                     | 2.68E-04 | 1.09E-02 | -2.01 |
| XU_HGF_TARGETS_INDUCED_BY_AKT1_6HR                                   | 7.59E-04 | 1.70E-02 | -2.01 |

|                                                                                                                |          |          |       |
|----------------------------------------------------------------------------------------------------------------|----------|----------|-------|
| HECKER_IFNB1_TARGETS                                                                                           | 6.69E-04 | 1.59E-02 | -2.03 |
| GAURNIER_PSMD4_TARGETS                                                                                         | 5.64E-04 | 1.43E-02 | -2.06 |
| CHNG_MULTIPLE_MYELOMA_HYPERPLOID_UP                                                                            | 6.34E-04 | 1.54E-02 | -2.09 |
| SANA_RESPONSE_TO_IFNG_UP                                                                                       | 3.28E-04 | 1.15E-02 | -2.10 |
| REACTOME_INFLUENZA_LIFE_CYCLE                                                                                  | 4.82E-04 | 1.31E-02 | -2.11 |
| STAMBOLSKY_TARGETS_OF_MUTATED_TP53_DN                                                                          | 6.10E-04 | 1.49E-02 | -2.13 |
| HALLMARK_INTERFERON_ALPHA_RESPONSE                                                                             | 3.75E-04 | 1.20E-02 | -2.13 |
| ZHANG_INTERFERON_RESPONSE                                                                                      | 2.60E-04 | 1.09E-02 | -2.20 |
| REACTOME_ACTIVATION_OF_THE_MRNA_UPON_BINDING_OF_THE_CAP_BINDING_COMPLEX_AND_EIFS_AND_SUBSEQUENT_BINDING_TO_43S | 3.17E-04 | 1.13E-02 | -2.28 |
| BOLTON_ANDROGEN_DOWN                                                                                           | 3.05E-04 | 1.11E-02 | -2.33 |
| BILANGES_SERUM_AND_RAPAMYCIN_SENSITIVE_GENES                                                                   | 3.40E-04 | 1.17E-02 | -2.33 |
| REACTOME_INTERFERON_ALPHA_BETA_SIGNALING                                                                       | 3.05E-04 | 1.11E-02 | -2.34 |
| BOWIE_RESPONSE_TO_TAMOXIFEN                                                                                    | 2.52E-04 | 1.09E-02 | -2.34 |
| REACTOME_NONSENSE_MEDIATED_DECAY_ENHANCED_BY_THE_EXON_JUNCTION_COMPLEX                                         | 4.18E-04 | 1.22E-02 | -2.38 |
| REACTOME_FORMATION_OF_THE_TERNARY_COMPLEX_AND_SUBSEQUENTLY_THE_43S_COMPLEX                                     | 3.01E-04 | 1.11E-02 | -2.39 |
| REACTOME_INFLUENZA_VIRAL_RNA_TRANSCRIPTION_AND_REPLICATION                                                     | 4.06E-04 | 1.20E-02 | -2.39 |
| RASHI_NFKB1_TARGETS                                                                                            | 2.58E-04 | 1.09E-02 | -2.40 |
| MOSERLE_IFNA_RESPONSE                                                                                          | 2.77E-04 | 1.10E-02 | -2.41 |
| FARMER_BREAST_CANCER_CLUSTER_1                                                                                 | 2.56E-04 | 1.09E-02 | -2.42 |
| KEGG_RIBOSOME                                                                                                  | 3.78E-04 | 1.20E-02 | -2.49 |
| EINAV_INTERFERON_SIGNATURE_IN_CANCER                                                                           | 2.68E-04 | 1.09E-02 | -2.52 |
| REACTOME_3_UTR_MEDIATED_TRANSLATIONAL_REGULATION                                                               | 3.96E-04 | 1.20E-02 | -2.52 |
| BENNETT_SYSTEMIC_LUPUS_ERYTHEMATOSUS                                                                           | 2.68E-04 | 1.09E-02 | -2.55 |
| REACTOME_PEPTIDE_CHAIN_ELONGATION                                                                              | 3.79E-04 | 1.20E-02 | -2.61 |

**Table S3:** Top 50 significantly enriched pathways associated with DNA methylation dynamics in HPr1-AR cells exposed to DHT for 96 hours.

| pathway                                        | pval     | padj     | NES  |
|------------------------------------------------|----------|----------|------|
| MIKKELSEN_MEF_HCP_WITH_H3K27ME3                | 1.00E-05 | 5.70E-04 | 2.93 |
| MIKKELSEN_MCV6_HCP_WITH_H3K27ME3               | 1.00E-05 | 5.70E-04 | 2.74 |
| BENPORATH_PRC2_TARGETS                         | 1.00E-05 | 5.70E-04 | 2.67 |
| MEISSNER_BRAIN_HCP_WITH_H3K27ME3               | 1.00E-05 | 5.70E-04 | 2.66 |
| BENPORATH_ES_WITH_H3K27ME3                     | 1.00E-05 | 5.70E-04 | 2.54 |
| MEISSNER_NPC_HCP_WIH_H3K4ME2_AND_H3K27ME3      | 1.00E-05 | 5.70E-04 | 2.51 |
| KONDO_PROSTATE_CANCER_WITH_H3K27ME3            | 1.10E-05 | 6.30E-04 | 2.51 |
| MARTENS_TRETINOIN_RESPONSE_UP                  | 1.00E-05 | 5.70E-04 | 2.5  |
| MIKKELSEN_NPC_HPC_WITH_H3K27ME3                | 1.00E-05 | 5.70E-04 | 2.49 |
| RICKMAN_HEAD_AND_NECK_CANCER_A                 | 1.00E-05 | 5.70E-04 | 2.49 |
| BENPORATH_SUZ12_TARGETS                        | 1.00E-05 | 5.70E-04 | 2.48 |
| NABA_MATRISOME                                 | 1.00E-05 | 5.70E-04 | 2.45 |
| ZHANG_LUMINAL                                  | 1.00E-05 | 5.70E-04 | 2.45 |
| KEGG_NEUROACTIVE_LIGAND_RECEPTOR_INTERACTION   | 1.00E-05 | 5.70E-04 | 2.44 |
| NABA_ECM_AFFILIATED                            | 1.00E-05 | 5.70E-04 | 2.43 |
| MIKKELSEN_IPS_WITH_HCP_H3K27ME3                | 1.00E-05 | 5.70E-04 | 2.43 |
| NABA_CORE_MATRISOME                            | 1.00E-05 | 5.70E-04 | 2.41 |
| ANASTASSIOU_MULTICANCER_INVASIVENESS_SIGNATURE | 1.00E-05 | 5.70E-04 | 2.36 |
| SABATES_COLORECTAL_ADENOMA_DN                  | 1.00E-05 | 5.70E-04 | 2.35 |
| SERVITJA_ISLET_HNF1A_TARGETS_DN                | 1.00E-05 | 5.70E-04 | 2.34 |
| RICKMAN_HEAD_AND_NECK_CANCER_E                 | 2.10E-05 | 9.60E-04 | 2.34 |
| HALLMARK_KRAS_SIGNALING_DN                     | 1.00E-05 | 1.11E-02 | 2.34 |
| NABA_ECM_GLYCOPROTEINS                         | 1.00E-05 | 5.70E-04 | 2.34 |
| MIKKELSEN_ES_LCP_WITH_H3K4ME3                  | 1.00E-05 | 5.70E-04 | 2.33 |
| MIKKELSEN_MCV6_LCP_WITH_H3K4ME3                | 1.00E-05 | 5.70E-04 | 2.33 |
| SENGUPTA_NASOPHARYNGEAL_CARINOMA_WITH_LMP1_DN  | 1.00E-05 | 5.70E-04 | 2.32 |
| MIKKELSEN_IPS_LCP_WITH_H3K4ME3                 | 1.00E-05 | 5.70E-04 | 2.32 |
| NABA_MATRISOM_ASSOCIATED                       | 1.00E-05 | 5.70E-04 | 2.3  |
| SERVITJA_ISLET_HNF1A_TARGETS_UP                | 1.00E-05 | 5.70E-04 | 2.29 |
| KATSANOUELAVL1_TARGETS_UP                      | 1.00E-05 | 5.70E-04 | 2.27 |
| LIANG_SILENCED_BY_METHYLATION_2                | 2.10E-05 | 9.60E-04 | 2.26 |
| SMID_BREAST_CANCER_NORMAL_LIKE_UP              | 1.00E-05 | 5.70E-04 | 2.25 |
| KEGG_COMPLEMENT_AND_COAGULATION_CASCADES       | 4.40E-05 | 1.80E-03 | 2.25 |
| SHUETZ_BREAST_CANCER_DUCTAL_INVASIVE_UP        | 1.00E-05 | 5.70E-04 | 2.24 |
| REACTOME_INTERACTION_BETWEEN_L1_AND_ANKYRINS   | 2.30E-05 | 1.00E-03 | 2.24 |
| MIKKELSEN_MEF_LCP_WITH_H3K4ME3                 | 1.00E-05 | 5.70E-04 | 2.24 |



|                                                   |          |          |      |
|---------------------------------------------------|----------|----------|------|
| SATO_SILENCED_EPIGENETICALLY_IN_PANCREATIC_CANCER | 2.10E-05 | 9.60E-04 | 2.24 |
| REACTOME_CLASS_A1_RHODOPSIN_LIKE_RECEPTORS        | 1.00E-05 | 5.70E-04 | 2.23 |
| ZHANG_ANTIVIRAL_RESPONSE_TO_RIBAVIRIN_UP          | 6.60E-05 | 2.40E-03 | 2.23 |
| TAKEDA_TARGETS_OF_NUP98_HOXA9_FUSION_10D_UP       | 1.00E-05 | 5.70E-04 | 2.22 |
| NAVA_ECM_REGULATORS                               | 1.00E-05 | 5.70E-04 | 2.21 |
| MIKKELSEN_MEF_ICP_WITH_H3K27ME3                   | 2.00E-05 | 9.60E-04 | 2.2  |
| MEISSNER_NPC_HCP_WITH_H3K27ME3                    | 3.10E-05 | 1.40E-03 | 2.2  |
| REACTOME_G_ALPHA_S_SIGNALLING_EVENTS              | 2.00E-05 | 9.60E-04 | 2.18 |
| MUELLER_METHYLATED_IN_GLIOMASTOMA                 | 6.40E-05 | 2.30E-03 | 2.18 |
| WANG_MLL_TARGETS                                  | 1.00E-05 | 5.70E-04 | 2.18 |
| REACTOME_POTASSIUM_CHANNELS                       | 5.20E-05 | 2.00E-03 | 2.17 |
| MIKKELSEN_ES_ICP_WITH_H3K4ME3                     | 1.00E-05 | 5.70E-04 | 2.15 |
| REN_ALVEOLAR_RHABDOMYOSARCOMA_UP                  | 4.10E-05 | 1.70E-03 | 2.14 |
| REACTOME_GPCR_LIGAND_BINDING                      | 1.00E-05 | 5.70E-04 | 2.14 |

Ladder EtOH DHT

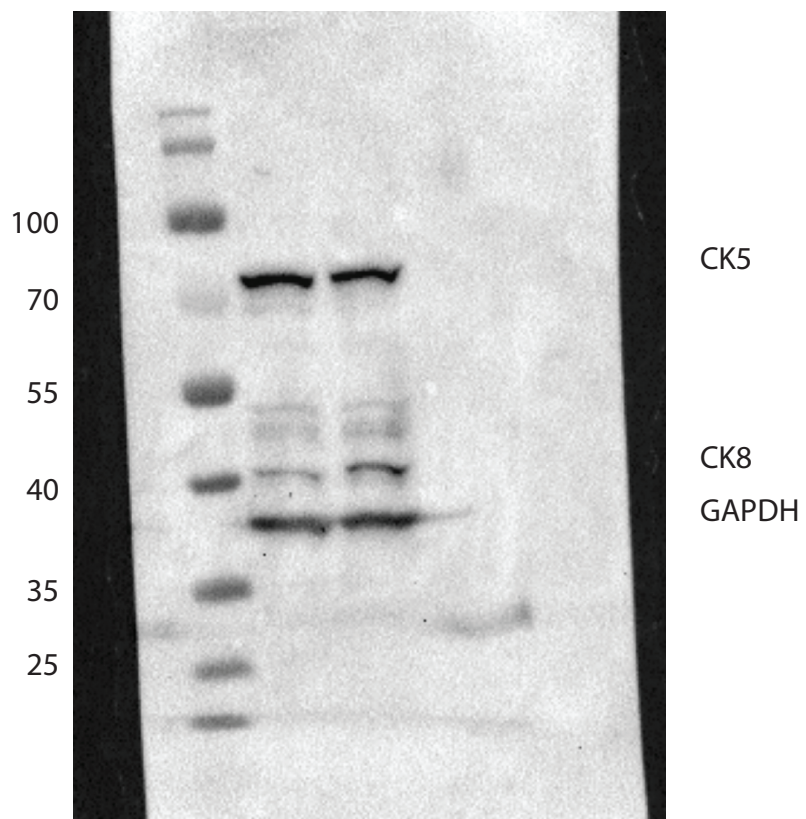

Supplement: 41598_2021_91037_MOESM1_ESM.pdf [file 41598_2021_91037_MOESM1_ESM.pdf]
